# Supplementary material for: Corneal Confocal Microscopy Predicts Cardiovascular and Cerebrovascular Events and Demonstrates Greater Peripheral Neuropathy in Patients with Type 1 Diabetes and Foot Ulcers
Source: MDPI journal article supplement (doi:10.3390/diagnostics13172793), 2023-08-29
Supplement: s1 [file s1]

**Supplementary Figure S1.** ROC curves for CNFD, CNBD, CNFL, VPT, CT and WT for T1D-DPN.

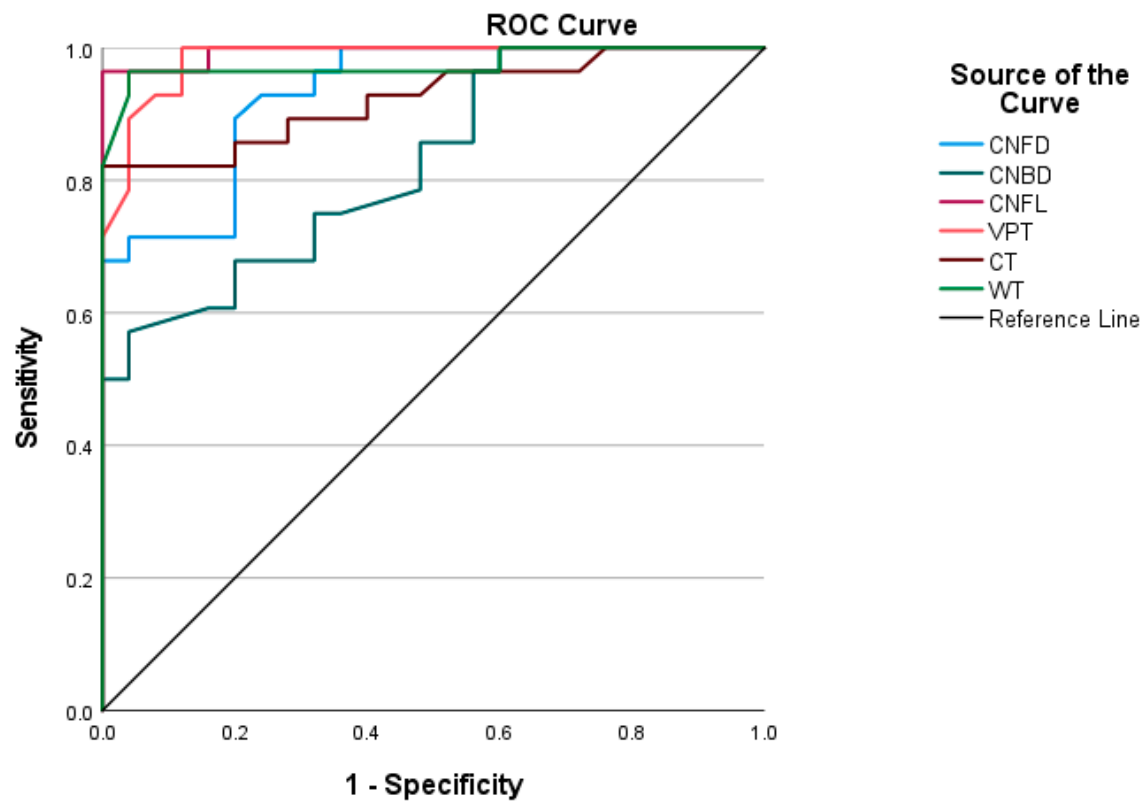

ROC – Receiver operating characteristic; CNFD – Corneal nerve fibre density; CNBD – Corneal nerve branch density; CNFL – Corneal nerve fibre length; VPT – Vibration perception threshold; CT – Cold Threshold; WT – Warm Threshold; T1D-DPN – type 1 diabetes with diabetic peripheral neuropathy.

**Supplementary Table S1.** ROC analysis with AUC, optimal cut off, sensitivity and specificity with 95% confidence interval in T1D with and without DPN.

|                             | <b>Optimal<br/>Cut-off</b> | <b>Sensitivity</b> | <b>Specificity</b> | <b>AUC (95% CI)</b> | <b><i>p</i> Value</b> |
|-----------------------------|----------------------------|--------------------|--------------------|---------------------|-----------------------|
| CNFD (no./mm <sup>2</sup> ) | 18.3                       | 0.86               | 0.80               | 0.93 (0.87-0.99)    | <0.001                |
| CNBD (no./mm <sup>2</sup> ) | 17.5                       | 0.75               | 0.68               | 0.83 (0.72-0.93)    | <0.001                |
| CNFL (mm/mm <sup>2</sup> )  | 16.2                       | 0.96               | 0.92               | 0.98 (0.96-1.00)    | <0.001                |
| VPT (Volts)                 | 12.1                       | 0.93               | 0.88               | 0.98 (0.95-1.00)    | <0.001                |
| CT (°C)                     | 23.5                       | 0.82               | 0.92               | 0.92 (0.85-0.99)    | <0.001                |
| WT (°C)                     | 39.9                       | 0.82               | 0.88               | 0.92 (0.85-0.99)    | <0.001                |

ROC – Receiver operating characteristic; AUC – area under the curve; CNFD – Corneal nerve fibre density; CNBD – Corneal nerve branch density; CNFL – Corneal nerve fibre length; VPT – Vibration perception threshold; CT – Cold Threshold; WT – Warm Threshold; T1D – Type 1 diabetes; T1D-DPN – Type 1 diabetes with diabetic peripheral neuropathy.

**Supplementary Table S2a.** Associations with incident cardiovascular events over 3 years in patients with T1D based on individual parameters with Cox regression analysis.

| Parameters                   | $\chi^2$ Value | HR (95% CI)       | <i>p</i> Value |
|------------------------------|----------------|-------------------|----------------|
| Age <sup>α</sup>             | 5.6            | 1.06 (1.01-1.12)  | 0.025          |
| Gender (male)                | 6.1            | 4.03 (1.15-14.08) | 0.030          |
| Duration of T1D <sup>α</sup> | 8.9            | 1.07 (1.02-1.13)  | 0.004          |
| CNFD <sup>β</sup>            | 17.1           | 1.29 (1.10-1.50)  | 0.001          |
| CNBD <sup>β</sup>            | 15.1           | 1.22 (1.06-1.40)  | 0.005          |
| CNFL <sup>β</sup>            | 16.4           | 1.32 (1.09-1.60)  | 0.005          |
| SNCV <sup>β</sup>            | 9.6            | 1.11 (1.02-1.21)  | 0.013          |
| SNAP <sup>β</sup>            | 8.5            | 1.36 (1.03-1.81)  | 0.031          |
| WT <sup>α</sup>              | 7.2            | 1.16 (1.04-1.29)  | 0.008          |
| CT <sup>β</sup>              | 13.5           | 1.20 (1.06-1.36)  | 0.004          |
| VPT <sup>α</sup>             | 9.7            | 1.11 (1.04-1.18)  | 0.002          |

$\chi^2$  – Chi-square value; HR – hazard ratio; 95% CI- 95% confidence interval; CNFD – Corneal nerve fibre density; CNBD – Corneal nerve branch density; CNFL – Corneal nerve fibre length; CT – Cold Threshold; WT – Warm Threshold; SNCV – Sural Nerve Conduction Velocity; SNAP – Sural Nerve Amplitude; T1D – Type 1 diabetes; VPT – Vibration perception threshold

$\alpha$  - Increased / higher value was associated with increased incidence of cardiovascular and cerebrovascular events

$\beta$  - Decreased / lower value was associated with increased incidence of cardiovascular and cerebrovascular events

**Supplementary Table S2b.** Associations with incident cerebrovascular events over 3 years in patients with T1D based on individual parameters with Cox regression analysis.

| Parameters                | $\chi^2$ Value | HR (95% CI)       | <i>p</i> Value |
|---------------------------|----------------|-------------------|----------------|
| Age <sup>α</sup>          | 3.4            | 1.05 (0.99-1.11)  | 0.074          |
| Gender (male)             | 8.1            | 5.99 (1.34-26.32) | 0.019          |
| Duration T1D <sup>α</sup> | 4.3            | 1.05 (1.00-1.10)  | 0.043          |
| CNFD <sup>β</sup>         | 16.8           | 1.29 (1.10-1.50)  | 0.001          |
| CNBD <sup>β</sup>         | 16.6           | 1.25 (1.07-1.46)  | 0.004          |
| CNFL <sup>β</sup>         | 18.1           | 1.38 (1.10-1.72)  | 0.005          |
| SNCV <sup>β</sup>         | 9.9            | 1.12 (1.03-1.23)  | 0.012          |
| SNAP <sup>β</sup>         | 10.1           | 1.46 (1.04-2.04)  | 0.026          |
| WT <sup>α</sup>           | 6.5            | 1.15 (1.03-1.28)  | 0.011          |
| CT <sup>β</sup>           | 10.4           | 1.17 (1.04-1.31)  | 0.008          |
| VPT <sup>α</sup>          | 9.6            | 1.11 (1.04-1.19)  | 0.002          |

$\chi^2$  – Chi-square value; HR – hazard ratio; 95% CI- 95% confidence interval; CNFD – Corneal nerve fibre density; CNBD – Corneal nerve branch density; CNFL – Corneal nerve fibre length; CT – Cold Threshold; WT – Warm Threshold; SNCV – Sural Nerve Conduction Velocity; SNAP – Sural Nerve Amplitude; T1D – Type 1 diabetes; VPT – Vibration perception threshold

$\alpha$  - Increased / higher value was associated with increased incidence of cardiovascular and cerebrovascular events

$\beta$  - Decreased / lower value was associated with increased incidence of cardiovascular and cerebrovascular events
